# Supplementary material
Source: publisher figshare collection journal article supplement (https://sage.figshare.com/ndownloader/files/18811277)
Supplement: Supplementary file 1 [file 18811277]

Supplementary Table 3.

*Quality Appraisal of the Cohort Studies Included in this Review (n = 2)*

| Appraisal Questions |                                                                                                            | Studies                  |                            |
|---------------------|------------------------------------------------------------------------------------------------------------|--------------------------|----------------------------|
|                     |                                                                                                            | Ratanawongs et al., 2008 | Willard-Grace et al., 2019 |
| Q1                  | Were the two groups similar and recruited from the same population?                                        | •                        | •                          |
| Q2                  | Were the exposures measured similarly to assign people to both exposed and unexposed groups?               | ?                        | •                          |
| Q3                  | Was the exposure measured in a valid and reliable way?                                                     | •                        | •                          |
| Q4                  | Were confounding factors identified?                                                                       | •                        | •                          |
| Q5                  | Were strategies to deal with confounding factors stated?                                                   | •                        | •                          |
| Q6                  | Were the groups/participants free of the outcome at the start of the study (or at the moment of exposure)? | ?                        | •                          |
| Q7                  | Were the outcomes measured in a valid and reliable way?                                                    | •                        | •                          |
| Q8                  | Was the follow up time reported and sufficient to be long enough for outcomes to occur?                    | •                        | •                          |
| Q9                  | Was follow up complete, and if not, were the reasons to loss to follow up described and explored?          | ?                        | •                          |
| Q10                 | Were strategies to address incomplete follow up utilized?                                                  | °                        | •                          |
| Q11                 | Was appropriate statistical analysis used?                                                                 | •                        | •                          |

Note. • = Yes; ° = No; ? = Unclear; N/A = Not Applicable; Q = Question;
